# Supplementary material
Source: Research Square preprint supplement (doi:10.21203/rs.3.rs-9644627/v1)
Supplement: Supplementary file 1 [file b73f1f6a6edddb6beb2023b7.pdf]

**Table 1. Cohort and episode characteristics by radiographic necrotizing enterocolitis discovery timing relative to first dose of antibiotics.**

|                                                                               | 1 <sup>st</sup> quartile<br>(< -2 hr),<br>n = 67 | 2 <sup>nd</sup> quartile<br>(>-2 to <0 hr)<br>n = 67 | 3 <sup>rd</sup> quartile<br>(0 to <12 hr),<br>n = 69 | 4 <sup>th</sup> quartile<br>(≥12 hr),<br>n = 68 | p-value |
|-------------------------------------------------------------------------------|--------------------------------------------------|------------------------------------------------------|------------------------------------------------------|-------------------------------------------------|---------|
| <b>Cohort</b>                                                                 |                                                  |                                                      |                                                      |                                                 |         |
| Gestational age at birth (weeks), median (IQR)                                | 27 (25, 29)                                      | 26 (25, 29)                                          | 27 (26, 30)                                          | 26 (25, 29)                                     | 0.4441  |
| Birth weight (grams), median (IQR)                                            | 735 (630,1045)                                   | 860 (645,1090)                                       | 805 (670,1085)                                       | 831 (656,994)                                   | 0.4388  |
| Male, n (%)                                                                   | 35 (52)                                          | 37 (55)                                              | 36 (52)                                              | 41 (60)                                         | 0.7529  |
| Length of stay for survivors to discharge (days), median (IQR)                | 102 (69,133)                                     | 103 (79,208)                                         | 72 (49,119)                                          | 111 (84,160)                                    | 0.0030  |
| Survived to discharge, n (%)                                                  | 59 (88)                                          | 50 (75)                                              | 43 (62)                                              | 57 (84)                                         | 0.0017  |
| <b>Episode</b>                                                                |                                                  |                                                      |                                                      |                                                 |         |
| Age at episode start (days), median (IQR)                                     | 22 (11,39)                                       | 22 (11,32)                                           | 22 (10,34)                                           | 21 (11,30)                                      | 0.8271  |
| nSOFA max, median (IQR)                                                       | 2 (0, 6)                                         | 4 (0, 11)                                            | 2 (0, 9)                                             | 3 (0, 8)                                        | 0.2726  |
| Vasoactive-inotropic treatment, n (%)                                         | 18 (27)                                          | 30 (45)                                              | 25 (36)                                              | 26 (38)                                         | 0.1909  |
| VIS max (among treated), median (IQR)                                         | 8 (5,27)                                         | 11 (5,40)                                            | 12 (8,24)                                            | 16 (5,26)                                       | 0.5347  |
| First radiographic finding, n (%)                                             |                                                  |                                                      |                                                      |                                                 |         |
| <i>Pneumatoxis</i>                                                            | 52 (78)                                          | 43 (64)                                              | 40 (58)                                              | 50 (74)                                         | 0.0585  |
| <i>Pneumoperitoneum (PP)</i>                                                  | 2 (3)                                            | 5 (7)                                                | 3 (4)                                                | 6 (9)                                           | 0.4463  |
| <i>Portal venous gas (PVG)</i>                                                | 3 (4)                                            | 2 (3)                                                | 3 (4)                                                | 0 (0)                                           | 0.3791  |
| <i>Pneumatoxis + PVG</i>                                                      | 2 (3)                                            | 12 (18)                                              | 18 (26)                                              | 5 (7)                                           | 0.0003  |
| <i>Pneumatoxis + PP</i>                                                       | 5 (7)                                            | 3 (4)                                                | 1 (1)                                                | 6 (9)                                           | 0.2378  |
| <i>Portal venous gas + PP</i>                                                 | 1 (1)                                            | 0 (0)                                                | 0 (0)                                                | 0 (0)                                           | 0.3831  |
| <i>Pneumatoxis + PVG + PP</i>                                                 | 2 (3)                                            | 2 (3)                                                | 4 (6)                                                | 1 (1)                                           | 0.5540  |
| Surgical intervention, n (%)                                                  | 15 (22)                                          | 30 (45)                                              | 28 (41)                                              | 27 (40)                                         | 0.0371  |
| Bacteremia/fungemia, n (%)                                                    | 9 (13)                                           | 19 (28)                                              | 13 (19)                                              | 16 (24)                                         | 0.1755  |
| Death with episode, n (%)                                                     | 6 (9)                                            | 11 (16)                                              | 21 (30)                                              | 8 (12)                                          | 0.0041  |
| Days of antibiotic treatment (episode survivors), median (IQR)                | 9 (7,11)                                         | 10 (7,14)                                            | 10 (7,12)                                            | 10 (8,16)                                       | 0.5088  |
| Hours from first dose antibiotics to first radiographic finding, median (IQR) | -4 (-7,-3)                                       | -1 (-2,-1)                                           | 3 (1,5)                                              | 37 (18,60)                                      | <0.0001 |
